# Supplementary material for: Detection of Sargassum from Sentinel Satellite Sensors Using Deep Learning Approach
Source: MDPI journal article supplement (doi:10.3390/rs15041104), 2023-02-17
Supplement: s1 [file s1]

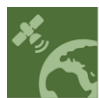**Supplementary Materials:****Table S1.** Sentinel-2 MSI images used for the CNN training between 2018 and 2022.

| Sentinel-2 | Tile   | Date Time (UTC)  |
|------------|--------|------------------|
| S2A        | T16QDH | 2018/07/16 16:09 |
| S2B        | T16QDH | 2018/09/19 16:09 |
| S2A        | T16QDH | 2018/09/24 16:10 |
| S2A        | T20PQV | 2019/01/29 14:37 |
| S2A        | T20PQB | 2019/01/29 14:37 |
| S2A        | T20PRV | 2019/01/29 14:37 |
| S2A        | T20PRU | 2019/01/29 14:37 |
| S2A        | T20PQU | 2019/01/29 14:37 |
| S2B        | T20PQB | 2020/04/08 14:37 |
| S2B        | T20PQB | 2020/04/08 14:37 |
| S2B        | T20PRB | 2020/04/08 14:37 |
| S2A        | T20PQB | 2020/07/02 14:37 |
| S2A        | T20PPC | 2021/03/02 14:47 |
| S2B        | T20PQA | 2021/04/03 14:37 |
| S2A        | T20PQB | 2022/01/13 14:37 |
| S2B        | T20PQB | 2021/07/12 14:37 |
| S2A        | T20PQB | 2021/11/04 14:37 |
| S2A        | T20PQB | 2021/11/14 14:37 |
| S2A        | T20PQB | 2022/01/13 14:37 |

**Table S2.** Sentinel-3 OLCI images of the Lesser Antilles used for the CNN training between 2017 and 2022.

| Sentinel-3 | Date Time (UTC)  |
|------------|------------------|
| S3A        | 2017/02/23 13:55 |
| S3A        | 2019/01/30 13:51 |
| S3A        | 2020/01/19 14:13 |
| S3B        | 2020/01/22 13:56 |
| S3A        | 2020/01/24 13:44 |
| S3A        | 2020/01/27 14:06 |
| S3A        | 2020/01/28 13:40 |
| S3B        | 2020/01/29 14:15 |
| S3B        | 2020/01/30 13:49 |
| S3B        | 2021/04/03 13:27 |
| S3B        | 2021/04/06 13:49 |
| S3A        | 2021/04/07 14:02 |
| S3A        | 2022/01/02 14:02 |
| S3A        | 2022/01/03 13:36 |
| S3A        | 2022/01/06 13:59 |

**Table S3.** Detail of our proposed network architecture for MSI images.

| Layer (type:depth-idx) | [input_channel, output_channel, H, W   Conv 2D] |
|------------------------|-------------------------------------------------|
| └─Sequential: 1-1      |                                                 |
| └─Conv2d: 2-1          | [12, 32, 128, 128]                              |
| └─BatchNorm2d: 2-2     | [32, 32, 128, 128]                              |
| └─LeakyReLU: 2-3       | [32, 32, 128, 128]                              |
| └─ResidualBlock2D: 1-2 |                                                 |
| └─Sequential: 2-4      |                                                 |
| └─Conv2d: 3-1          | [32, 32, 128, 128]                              |
| └─BatchNorm2d: 3-2     | [32, 32, 128, 128]                              |
| └─PReLU: 3-3           | [32, 32, 128, 128]                              |
| └─Conv2d: 3-4          | [32, 32, 128, 128]                              |
| └─BatchNorm2d: 3-5     | [32, 32, 128, 128]                              |
| └─MaxPool2d: 1-3       | [32, 32, 64, 64]                                |
| └─Sequential: 1-4      | --                                              |
| └─Conv2d: 2-5          | [32, 64, 64, 64]                                |
| └─BatchNorm2d: 2-6     | [64, 64, 64, 64]                                |
| └─LeakyReLU: 2-7       | [64, 64, 64, 64]   --                           |
| └─ResidualBlock2D: 1-5 | --                                              |
| └─Sequential: 2-8      | --                                              |
| └─Conv2d: 3-6          | [64, 64, 64, 64]                                |
| └─BatchNorm2d: 3-7     | [64, 64, 64, 64]                                |
| └─PReLU: 3-8           | [64, 64, 64, 64]                                |
| └─Conv2d: 3-9          | [64, 64, 64, 64]                                |
| └─BatchNorm2d: 3-10    | [64, 64, 64, 64]                                |
| └─ResidualBlock2D: 1-6 |                                                 |
| └─Sequential: 2-9      |                                                 |
| └─Conv2d: 3-11         | [64, 64, 64, 64]                                |
| └─BatchNorm2d: 3-12    | [64, 64, 64, 64]                                |
| └─PReLU: 3-13          | [64, 64, 64, 64]                                |
| └─Conv2d: 3-14         | [64, 64, 64, 64]                                |
| └─BatchNorm2d: 3-15    | [64, 64, 64, 64]                                |
| └─Sequential: 1-7      | --                                              |
| └─Conv2d: 2-10         | [64, 32, 64, 64]                                |
| └─BatchNorm2d: 2-11    | [32, 32, 64, 64]                                |
| └─LeakyReLU: 2-12      | [32, 32, 64, 64]                                |
| └─ResidualBlock2D: 1-8 |                                                 |
| └─Sequential: 2-13     |                                                 |
| └─Conv2d: 3-16         | [32, 32, 128, 128]                              |
| └─BatchNorm2d: 3-17    | [32, 32, 128, 128]                              |

|  |                     |                     |                    |
|--|---------------------|---------------------|--------------------|
|  |                     | └─PReLU: 3-18       | [32, 32, 128, 128] |
|  |                     | └─Conv2d: 3-19      | [32, 32, 128, 128] |
|  |                     | └─BatchNorm2d: 3-20 | [32, 32, 128, 128] |
|  | └─Sequential: 1-9   | --                  |                    |
|  | └─Conv2d: 2-14      | [32, 1, 128, 128]   |                    |
|  | └─BatchNorm2d: 2-15 | [32, 1, 128, 128]   |                    |

---

Total params: 226,762

---

**Table S4.** Detail of our proposed network architecture for OLCI images.

| Layer (type:depth-idx) | [input_channel, output_channel, H, W | Conv 2D] |
|------------------------|--------------------------------------|----------|
| └─Sequential: 1-1      | -                                    |          |
| └─Conv2d: 2-1          | [21, 32, 128, 128]                   |          |
| └─BatchNorm2d: 2-2     | [32, 32, 128, 128]                   |          |
| └─LeakyReLU: 2-3       | [32, 32, 128, 128]                   |          |
| └─ResidualBlock2D: 1-2 |                                      |          |
| └─Sequential: 2-4      |                                      |          |
| └─Conv2d: 3-1          | [32, 32, 128, 128]                   |          |
| └─BatchNorm2d: 3-2     | [32, 32, 128, 128]                   |          |
| └─PReLU: 3-3           | [32, 32, 128, 128]                   |          |
| └─Conv2d: 3-4          | [32, 32, 128, 128]                   |          |
| └─BatchNorm2d: 3-5     | [32, 32, 128, 128]                   |          |
| └─MaxPool2d: 1-3       | [32, 32, 64, 64]                     |          |
| └─Sequential: 1-4      |                                      |          |
| └─Conv2d: 2-5          | [32, 64, 64, 64]                     |          |
| └─BatchNorm2d: 2-6     | [64, 64, 64, 64]                     |          |
| └─LeakyReLU: 2-7       | [64, 64, 64, 64]                     |          |
| └─ResidualBlock2D: 1-5 |                                      |          |
| └─Sequential: 2-8      |                                      |          |
| └─Conv2d: 3-6          | [64, 64, 64, 64]                     |          |
| └─BatchNorm2d: 3-7     | [64, 64, 64, 64]                     |          |
| └─PReLU: 3-8           | [64, 64, 64, 64]                     |          |
| └─Conv2d: 3-9          | [64, 64, 64, 64]                     |          |
| └─BatchNorm2d: 3-10    | [64, 64, 64, 64]                     |          |
| └─MaxPool2d: 1-6       | [64, 64, 32, 32]                     |          |
| └─Sequential: 1-7      |                                      |          |
| └─Conv2d: 2-9          | [64, 128, 32, 32]                    |          |
| └─BatchNorm2d: 2-10    | [128, 128, 32, 32]                   |          |
| └─LeakyReLU: 2-11      | [128, 128, 32, 32]                   |          |
| └─ResidualBlock2D: 1-8 |                                      |          |

|  |                         |                          |
|--|-------------------------|--------------------------|
|  | └─Sequential: 2-12      |                          |
|  | └─Conv2d: 3-11          | [128, 128, 32, 32]       |
|  | └─BatchNorm2d: 3-12     | [128, 128, 32, 32]       |
|  | └─PReLU: 3-13           | [128, 128, 32, 32]       |
|  | └─Conv2d: 3-14          | [128, 128, 32, 32]       |
|  | └─BatchNorm2d: 3-15     | [128, 128, 32, 32]       |
|  | └─ResidualBlock2D: 1-9  |                          |
|  | └─Sequential: 2-13      |                          |
|  | └─Conv2d: 3-16          | [128, 128, 32, 32]       |
|  | └─BatchNorm2d: 3-17     | [128, 128, 32, 32]       |
|  | └─PReLU: 3-18           | [128, 128, 32, 32]       |
|  | └─Conv2d: 3-19          | [128, 128, 32, 32]       |
|  | └─BatchNorm2d: 3-20     | [128, 128, 32, 32]       |
|  | └─Sequential: 1-10      |                          |
|  | └─Conv2d: 2-14          | [128, 64, 32, 32]        |
|  | └─BatchNorm2d: 2-15     | [64, 64, 32, 32]         |
|  | └─LeakyReLU: 2-16       | [64, 64, 32, 32]         |
|  | └─Attention_block: 1-11 | [64, 64, 64, 64] x * psi |
|  | └─Sequential: 2-17      |                          |
|  | └─Conv2d: 3-21          | [64, 32, 64, 64]         |
|  | └─BatchNorm2d: 3-22     | [32, 32, 64, 64]         |
|  | └─Sequential: 2-18      |                          |
|  | └─Conv2d: 3-23          | [32, 32, 64, 64]         |
|  | └─BatchNorm2d: 3-24     | [32, 32, 64, 64]         |
|  | └─ReLU: 2-19            | [ 32, 32, 64, 64]        |
|  | └─Sequential: 2-20      | --                       |
|  | └─Conv2d: 3-25          | [32, 2, 64, 64]          |
|  | └─BatchNorm2d: 3-26     | [2, 2, 64, 64]           |
|  | └─Sigmoid: 3-27         | [2, 2, 64, 64]           |
|  | └─ResidualBlock2D: 1-12 |                          |
|  | └─Sequential: 2-21      |                          |
|  | └─Conv2d: 3-28          | [64, 64, 64, 64]         |
|  | └─BatchNorm2d: 3-29     | [64, 64, 64, 64]         |
|  | └─PReLU: 3-30           | [64, 64, 64, 64]         |
|  | └─Conv2d: 3-31          | [64, 64, 64, 64]         |
|  | └─BatchNorm2d: 3-32     | [64, 64, 64, 64]         |
|  | └─Sequential: 1-13      | --                       |
|  | └─Conv2d: 2-22          | [64, 32, 64, 64]         |
|  | └─BatchNorm2d: 2-23     | [64, 32, 64, 64]         |
|  | └─LeakyReLU: 2-24       | [64, 32, 64, 64]         |

|                         |                            |
|-------------------------|----------------------------|
| └─Attention_block: 1-14 | [32, 32, 128, 128] x * psi |
| └─Sequential: 2-25      |                            |
| └─Conv2d: 3-33          | [32, 16, 128, 128]         |
| └─BatchNorm2d: 3-34     | [16, 16, 128, 128]         |
| └─Sequential: 2-26      | --                         |
| └─Conv2d: 3-35          | [16, 16, 128, 128]         |
| └─BatchNorm2d: 3-36     | [16, 16, 128, 128]         |
| └─ReLU: 2-27            | [16, 16, 128, 128]         |
| └─Sequential: 2-28      |                            |
| └─Conv2d: 3-37          | [16, 2, 128, 128]          |
| └─BatchNorm2d: 3-38     | [2, 2, 128, 128]           |
| └─Sigmoid: 3-39         | [2, 2, 128, 128]           |
| └─ResidualBlock2D: 1-15 |                            |
| └─Sequential: 2-29      |                            |
| └─Conv2d: 3-40          | [32, 32, 128, 128]         |
| └─BatchNorm2d: 3-41     | [32, 32, 128, 128]         |
| └─PReLU: 3-42           | [32, 32, 128, 128]         |
| └─Conv2d: 3-43          | [32, 32, 128, 128]         |
| └─BatchNorm2d: 3-44     | [32, 32, 128, 128]         |
| └─Sequential: 1-16      |                            |
| └─Conv2d: 2-30          | [32, 1, 128, 128]          |
| └─BatchNorm2d: 2-31     | [1, 1, 128, 128]           |

Total params: 973,145

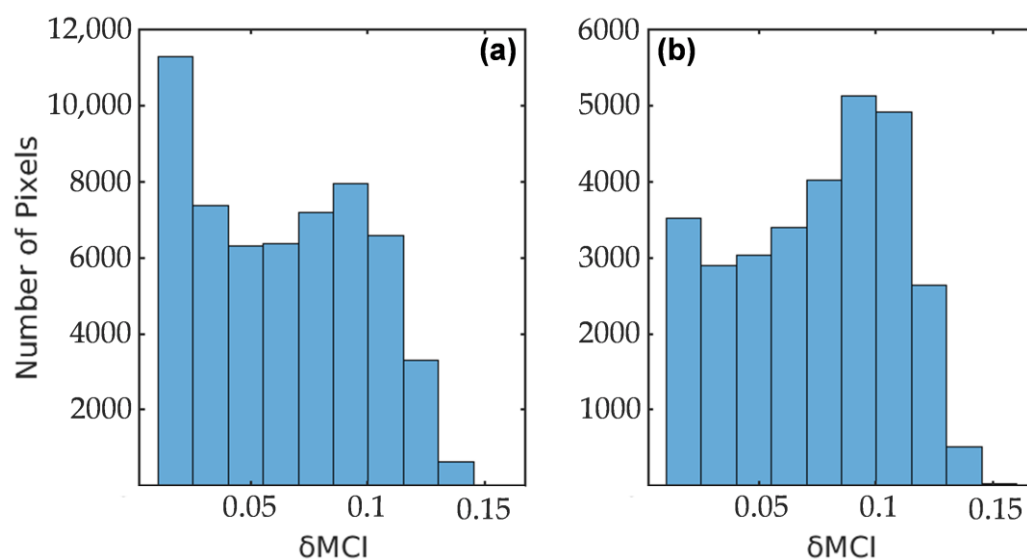

**Figure S1.** Distribution of  $\delta MCI$  computed by the CNN of (a) all OLCI pixels and (b) of OLCI pixels

---

overlaying with MSI pixels. MSI image, PRV tile and OLCI image from 29 January 2019 at 14:37 and 13:38 respectively (Figure 8).
